# Supplementary material
Source: PubMed Central journal article supplement (PMC4806541)
Supplement: 000725.pdf [file 000725.pdf]

**The novel, extremely acidophilic, cell wall-deficient archaea *Cuniculiplasma divulgatum* gen. nov., sp. nov. represent a new Family of *Cuniculiplasmataceae* fam. nov., order *Thermoplasmatales*.**

Olga V. Golyshina<sup>1#</sup>, Heinrich Lünsdorf<sup>2</sup>, Ilya V. Kublanov<sup>3</sup>, Nadine I. Goldenstein<sup>4</sup>, Kai-Uwe Hinrichs<sup>4</sup> and Peter N. Golyshin<sup>1</sup>

*International Journal of Systematic and Evolutionary Microbiology*

<sup>1</sup> School of Biological Sciences, Bangor University, Deiniol Rd, Bangor, LL57 2UW, UK

# Corresponding author e-mail: [o.golyshina@bangor.ac.uk](mailto:o.golyshina@bangor.ac.uk)

### Supplementary materials:

**Table S1:** Relative abundances of major lipid groups and individual structures contributing to these lipid groups in the strains S5 and PM4. (abbreviations: intact polar- (IP-), archaeol (AR), glycerol-dibiphytanyl-diether (GDD), monoglycosidic-phosphatidylglycerol- (1G-PG-), phosphatidylglycerol- (PG-), monoglycosidic- (1G-), diglycosidic- (2G-), triglycosidic- (3G-) tetraglycosidic- (4G-) glycerol-dibiphytanyl-glycerol-tetraether (GDGT), glycerol-trialkyl-glycerol-tetraether (GTGT), GDGT with zero to four cyclopentane moieties (GDGT 0 - 4), H-shaped (H-) GDGT, methylated (Me-) GDGT, menaquinone (MK), thermoplasmaquinone (TPQ), glycosidic- (G-), glycosidic-hydroxylated (G-OH-), phospho- (P-) AR, core hydroxylated- (OH-), unsaturated (uns) AR).

| Major lipid groups | Strain S5 | Strain PM4 | Individual lipid structures within major lipid groups | Strain S5 | Strain PM4 |
|--------------------|-----------|------------|-------------------------------------------------------|-----------|------------|
| C-AR               | 5.1%      | 3.9%       | AR                                                    | 63.3%     | 66.1%      |
|                    |           |            | unsAR                                                 | 32.5%     | 32.4%      |
|                    |           |            | OH-AR                                                 | 4.1%      | 1.5%       |
| core GDGT          | 14.8%     | 25.1%      | GDGT-0                                                | 13.7%     | 14.1%      |
|                    |           |            | GDGT-1                                                | 4.8%      | 8.2%       |
|                    |           |            | GDGT-2                                                | 25.3%     | 26.7%      |
|                    |           |            | GDGT-3                                                | 10.3%     | 12.4%      |
|                    |           |            | GDGT-4                                                | 30.1%     | 25.5%      |
|                    |           |            | GTGT                                                  | 6.0%      | 4.5%       |
|                    |           |            | H-GDGT                                                | 9.9%      | 5.1%       |
|                    |           |            | Me-GDGT                                               | 0.0%      | 3.4%       |

|            |       |       |              |       |       |
|------------|-------|-------|--------------|-------|-------|
| GDD        | 0.1%  | 0.1%  | C-GDD        | 27.7% | 58.1% |
|            |       |       | IP-GDD       | 72.3% | 41.9% |
| IP-AR      | 3.3%  | 2.4%  | G-AR         | 25.6% | 34.9% |
|            |       |       | G-OH-AR      | 71.9% | 36.7% |
|            |       |       | P-AR         | 2.4%  | 28.4% |
| 1G-GDGT    | 56.1% | 32.9% | 1G-GDGT-0    | 8.5%  | 13.4% |
|            |       |       | 1G-GDGT-1    | 6.3%  | 9.5%  |
|            |       |       | 1G-GDGT-2    | 28.3% | 26.9% |
|            |       |       | 1G-GDGT-3    | 20.8% | 15.8% |
|            |       |       | 1G-GDGT-4    | 32.7% | 32.0% |
|            |       |       | 1G-H-GDGT    | 3.4%  | 2.4%  |
| 2G-GDGT    | 2.4%  | 0.4%  | 2G-GDGT-0    | 7.6%  | 9.0%  |
|            |       |       | 2G-GDGT-1    | 5.7%  | 9.5%  |
|            |       |       | 2G-GDGT-2    | 40.6% | 46.6% |
|            |       |       | 2G-GDGT-3    | 15.9% | 7.9%  |
|            |       |       | 2G-GDGT-4    | 30.3% | 27.1% |
| 3G-GDGT    | 0.5%  | 1.0%  | 3G-GDGT-0    | 9.6%  | 5.2%  |
|            |       |       | 3G-GDGT-1    | 7.4%  | 5.4%  |
|            |       |       | 3G-GDGT-2    | 42.4% | 38.1% |
|            |       |       | 3G-GDGT-3    | 17.8% | 20.8% |
|            |       |       | 3G-GDGT-4    | 22.8% | 30.6% |
| 4G-GDGT    | 0.0%  | 3.2%  | 4G-GDGT-0    | 0.0%  | 8.9%  |
|            |       |       | 4G-GDGT-1    | 0.0%  | 12.0% |
|            |       |       | 4G-GDGT-2    | 0.0%  | 52.2% |
|            |       |       | 4G-GDGT-3    | 0.0%  | 13.7% |
|            |       |       | 4G-GDGT-4    | 0.0%  | 13.1% |
| PG-GDGT    | 8.3%  | 19.9% | PG-GDGT-0    | 31.1% | 3.0%  |
|            |       |       | PG-GDGT-1    | 14.0% | 2.8%  |
|            |       |       | PG-GDGT-2    | 46.5% | 18.5% |
|            |       |       | PG-GDGT-3    | 8.3%  | 14.0% |
|            |       |       | PG-GDGT-4    | 0.0%  | 61.7% |
| 1G-PG-GDGT | 1.1%  | 2.2%  | 1G-PG-GDGT-0 | 17.9% | 0.0%  |
|            |       |       | 1G-PG-GDGT-1 | 11.0% | 0.0%  |
|            |       |       | 1G-PG-GDGT-2 | 43.3% | 7.1%  |
|            |       |       | 1G-PG-GDGT-3 | 12.4% | 7.5%  |
|            |       |       | 1G-PG-GDGT-4 | 15.3% | 85.4% |
| Quinones   | 8.3%  | 9.0%  | MK           | 84.3% | 94.5% |
|            |       |       | TPQ          | 15.7% | 5.5%  |
